# Supplementary material for: Medical student attitudes towards family medicine in Spain: a statewide analysis
Source: PubMed Central journal article supplement (PMC3436784; doi:10.1186/1471-2296-13-47), 2012-05-29

1.

1. Check the name of the university you attend:

Universitat Autònoma de Barcelona (080)

Universidad de Málaga (290)

Universidad Autónoma de Madrid (280)

Universidad Miguel Hernández (030)

Universidad Complutense de Madrid (281)

Universidad de Murcia (300)

Universidad de Alcalá de Henares (282)

Universidad de Oviedo (330)

Universitat de Barcelona (081)

Universidad de Salamanca (370)

Universidad de Cantabria (390)

Universidad de Santiago de Compostela (150)

Universidad de Córdoba (140)

Universidad de Sevilla (410)

Universidad de Extremadura (060)

Universitat Rovira Virgili (430)

Universidad de Granada (180)

Universidad de Valencia (460)

Universidad de La Laguna (380)

Universidad de Valladolid (470)

Universidad de Las Palmas (350)

Universidad de Zaragoza (500)

Universitat de Lleida (250)

2. What year of medical school are you in at present?

Third

Fifth

Sixth

## 2. Perceptions about family medicine

1. Express your opinion of the following: Do you believe that in Spain family medicine:

|                                                                 | Totally disagree |     |     |     |     | Totally agree |
|-----------------------------------------------------------------|------------------|-----|-----|-----|-----|---------------|
| Has a high level status within the medical profession           | 100              | 100 | 100 | 100 | 100 | 100           |
| Has a high level social status                                  | 100              | 100 | 100 | 100 | 100 | 100           |
| Has scientific prestige that is equivalent to other specialties | 100              | 100 | 100 | 100 | 100 | 100           |
| Plays an essential social role                                  | 100              | 100 | 100 | 100 | 100 | 100           |
| Is an interesting specialty for research                        | 100              | 100 | 100 | 100 | 100 | 100           |
| Provides a high salary compared to other specialties            | 100              | 100 | 100 | 100 | 100 | 100           |
| Provides a pleasant working environment                         | 100              | 100 | 100 | 100 | 100 | 100           |
| Is attractive                                                   | 100              | 100 | 100 | 100 | 100 | 100           |

2. Evaluate the influence of the following factors on the opinion that you have of family medicine:

|                                                            | None |     |     |     |     | Much |
|------------------------------------------------------------|------|-----|-----|-----|-----|------|
| My personal experience as a patient                        | 100  | 100 | 100 | 100 | 100 | 100  |
| The opinion of hospital physicians about family physicians | 100  | 100 | 100 | 100 | 100 | 100  |
| The opinion of family physicians                           | 100  | 100 | 100 | 100 | 100 | 100  |
| The opinion of my family and/or friends                    | 100  | 100 | 100 | 100 | 100 | 100  |
| Information from the social news media                     | 100  | 100 | 100 | 100 | 100 | 100  |
| My own experience during my course of study                | 100  | 100 | 100 | 100 | 100 | 100  |

3. Have you heard comments about family medicine in your medical school?

NO. Go to Section B.

YES. Evaluate the comments you have heard from:

|                     | Very negative |     |     |     |     | Very positive |
|---------------------|---------------|-----|-----|-----|-----|---------------|
| Hospital physicians | 100           | 100 | 100 | 100 | 100 | 100           |
| Family physicians   | 100           | 100 | 100 | 100 | 100 | 100           |
| Professors          | 100           | 100 | 100 | 100 | 100 | 100           |
| Fellow students     | 100           | 100 | 100 | 100 | 100 | 100           |

### 3. Training in family medicine in medical school

Express your opinion of the following:

#### 1. There are sufficient reasons

|                                                                                           | Totally disagree      |                       |                       |                       |                       | Totally agree         |
|-------------------------------------------------------------------------------------------|-----------------------|-----------------------|-----------------------|-----------------------|-----------------------|-----------------------|
| to justify theoretical-practical obligatory training in family medicine in medical school | <input type="radio"/> | <input type="radio"/> | <input type="radio"/> | <input type="radio"/> | <input type="radio"/> | <input type="radio"/> |

#### 2. Training in family medicine should be obligatory because:

|                                                 | Totally disagree      |                       |                       |                       |                       | Totally agree         |
|-------------------------------------------------|-----------------------|-----------------------|-----------------------|-----------------------|-----------------------|-----------------------|
| It has specific scientific content              | <input type="radio"/> | <input type="radio"/> | <input type="radio"/> | <input type="radio"/> | <input type="radio"/> | <input type="radio"/> |
| It is a common professional choice              | <input type="radio"/> | <input type="radio"/> | <input type="radio"/> | <input type="radio"/> | <input type="radio"/> | <input type="radio"/> |
| It contributes to the improvement of healthcare | <input type="radio"/> | <input type="radio"/> | <input type="radio"/> | <input type="radio"/> | <input type="radio"/> | <input type="radio"/> |
| It is a central part of the health system       | <input type="radio"/> | <input type="radio"/> | <input type="radio"/> | <input type="radio"/> | <input type="radio"/> | <input type="radio"/> |

#### 3. Training in family medicine should be

|                                                | Totally disagree      |                       |                       |                       |                       | Totally agree         |
|------------------------------------------------|-----------------------|-----------------------|-----------------------|-----------------------|-----------------------|-----------------------|
| Integrated into the content of related courses | <input type="radio"/> | <input type="radio"/> | <input type="radio"/> | <input type="radio"/> | <input type="radio"/> | <input type="radio"/> |
| A specific course                              | <input type="radio"/> | <input type="radio"/> | <input type="radio"/> | <input type="radio"/> | <input type="radio"/> | <input type="radio"/> |
| Both ways                                      | <input type="radio"/> | <input type="radio"/> | <input type="radio"/> | <input type="radio"/> | <input type="radio"/> | <input type="radio"/> |

#### 4. The teaching content of family medicine:

|                                              | Totally disagree      |                       |                       |                       |                       | Totally agree         |
|----------------------------------------------|-----------------------|-----------------------|-----------------------|-----------------------|-----------------------|-----------------------|
| should always be taught by family physicians | <input type="radio"/> | <input type="radio"/> | <input type="radio"/> | <input type="radio"/> | <input type="radio"/> | <input type="radio"/> |

#### 5. In what year of medical school do you think this training should begin?

- |                              |                              |
|------------------------------|------------------------------|
| <input type="radio"/> First  | <input type="radio"/> Fourth |
| <input type="radio"/> Second | <input type="radio"/> Fifth  |
| <input type="radio"/> Third  | <input type="radio"/> Sixth  |

6. Evaluate the importance of the following contributions of family medicine to medical school training:

|                                                            | None                  |                       |                       |                       |                       | Much                  |
|------------------------------------------------------------|-----------------------|-----------------------|-----------------------|-----------------------|-----------------------|-----------------------|
| Communication / doctor-patient relationship                | <input type="radio"/> | <input type="radio"/> | <input type="radio"/> | <input type="radio"/> | <input type="radio"/> | <input type="radio"/> |
| Prevention and health promotion                            | <input type="radio"/> | <input type="radio"/> | <input type="radio"/> | <input type="radio"/> | <input type="radio"/> | <input type="radio"/> |
| Bio-psychosocial focus of care                             | <input type="radio"/> | <input type="radio"/> | <input type="radio"/> | <input type="radio"/> | <input type="radio"/> | <input type="radio"/> |
| Family focus of care                                       | <input type="radio"/> | <input type="radio"/> | <input type="radio"/> | <input type="radio"/> | <input type="radio"/> | <input type="radio"/> |
| Community focus of care                                    | <input type="radio"/> | <input type="radio"/> | <input type="radio"/> | <input type="radio"/> | <input type="radio"/> | <input type="radio"/> |
| Clinical care for the most frequent problems               | <input type="radio"/> | <input type="radio"/> | <input type="radio"/> | <input type="radio"/> | <input type="radio"/> | <input type="radio"/> |
| Care during the life span                                  | <input type="radio"/> | <input type="radio"/> | <input type="radio"/> | <input type="radio"/> | <input type="radio"/> | <input type="radio"/> |
| Emergencies                                                | <input type="radio"/> | <input type="radio"/> | <input type="radio"/> | <input type="radio"/> | <input type="radio"/> | <input type="radio"/> |
| Clinical epidemiology                                      | <input type="radio"/> | <input type="radio"/> | <input type="radio"/> | <input type="radio"/> | <input type="radio"/> | <input type="radio"/> |
| Teamwork                                                   | <input type="radio"/> | <input type="radio"/> | <input type="radio"/> | <input type="radio"/> | <input type="radio"/> | <input type="radio"/> |
| Bioethics                                                  | <input type="radio"/> | <input type="radio"/> | <input type="radio"/> | <input type="radio"/> | <input type="radio"/> | <input type="radio"/> |
| Research                                                   | <input type="radio"/> | <input type="radio"/> | <input type="radio"/> | <input type="radio"/> | <input type="radio"/> | <input type="radio"/> |
| Collaboration with other sectors (education, social, ....) | <input type="radio"/> | <input type="radio"/> | <input type="radio"/> | <input type="radio"/> | <input type="radio"/> | <input type="radio"/> |

7. Express your opinion of the training sessions in health centres:

|                            | None                  |                       |                       |                       |                       | Much                  |
|----------------------------|-----------------------|-----------------------|-----------------------|-----------------------|-----------------------|-----------------------|
| Usefulness of the sessions | <input type="radio"/> | <input type="radio"/> | <input type="radio"/> | <input type="radio"/> | <input type="radio"/> | <input type="radio"/> |

8. During what year/s of medical school should these take place?

- |                              |                              |
|------------------------------|------------------------------|
| <input type="radio"/> First  | <input type="radio"/> Fourth |
| <input type="radio"/> Second | <input type="radio"/> Fifth  |
| <input type="radio"/> Third  | <input type="radio"/> Sixth  |

9. What percentage of the total practical training in medical school do you think should be dedicated to family medicine?

- |                              |                              |
|------------------------------|------------------------------|
| <input type="radio"/> < 10%  | <input type="radio"/> 50-75% |
| <input type="radio"/> 10-25% | <input type="radio"/> 75-90% |
| <input type="radio"/> 25-50% | <input type="radio"/> > 90%  |

## 4. Expectations and preferences

1. Evaluate your degree of interest in working in one of the following environments after medical school

|                                                  | None |    |    |    |    | Much |
|--------------------------------------------------|------|----|----|----|----|------|
| Medical/hospital specialties                     | jñ   | jñ | jñ | jñ | jñ | jñ   |
| Surgical/hospital specialties                    | jñ   | jñ | jñ | jñ | jñ | jñ   |
| Family medicine                                  | jñ   | jñ | jñ | jñ | jñ | jñ   |
| Paediatrics                                      | jñ   | jñ | jñ | jñ | jñ | jñ   |
| Obstetrics and gynecology                        | jñ   | jñ | jñ | jñ | jñ | jñ   |
| Psychiatry                                       | jñ   | jñ | jñ | jñ | jñ | jñ   |
| Dermatology                                      | jñ   | jñ | jñ | jñ | jñ | jñ   |
| Ophthalmology                                    | jñ   | jñ | jñ | jñ | jñ | jñ   |
| Otorhinolaryngology                              | jñ   | jñ | jñ | jñ | jñ | jñ   |
| Preventive medicine and public health            | jñ   | jñ | jñ | jñ | jñ | jñ   |
| Laboratory                                       | jñ   | jñ | jñ | jñ | jñ | jñ   |
| Imaging diagnosis (radiology, pathoanatomy,....) | jñ   | jñ | jñ | jñ | jñ | jñ   |
| Research                                         | jñ   | jñ | jñ | jñ | jñ | jñ   |
| Teaching                                         | jñ   | jñ | jñ | jñ | jñ | jñ   |

2. Evaluate the importance you will give to the following characteristics in your selection of a specialty after you finish medical school

|                                                                                | None |    |    |    |    | Much |
|--------------------------------------------------------------------------------|------|----|----|----|----|------|
| Covers an ample spectrum of clinical problems                                  | jn   | jn | jn | jn | jn | jn   |
| Allows for care of a wide range of patients of different ages                  | jn   | jn | jn | jn | jn | jn   |
| Centers on a more concrete spectrum of clinical problems                       | jn   | jn | jn | jn | jn | jn   |
| Allows for the immediate visualization of the results of professional activity | jn   | jn | jn | jn | jn | jn   |
| Has scientific prestige                                                        | jn   | jn | jn | jn | jn | jn   |
| Requires a high level of professional dedication and commitment                | jn   | jn | jn | jn | jn | jn   |
| Training in a specialty requires much effort                                   | jn   | jn | jn | jn | jn | jn   |
| Provides a high earning capability                                             | jn   | jn | jn | jn | jn | jn   |
| Allows for a close relationship with patients                                  | jn   | jn | jn | jn | jn | jn   |
| Allows for good working conditions and quality of life                         | jn   | jn | jn | jn | jn | jn   |

3. If in future you should work as a family physician,

|                                           | Very low |    |    |    | Very high |    |
|-------------------------------------------|----------|----|----|----|-----------|----|
| what would your level of satisfaction be? | jn       | jn | jn | jn | jn        | jn |

4. When you started in medical school, had you made a clear decision about the specialty you wanted to follow?

No

Yes

5. Have you changed your specialty preferences as you've gone through medical school?

No. Go to the next question

YES. Evaluate the importance of the following factors in your change of preferences

|                                                     | None                  |                       |                       |                       |                       | Much                  |
|-----------------------------------------------------|-----------------------|-----------------------|-----------------------|-----------------------|-----------------------|-----------------------|
| Opinions and information from professionals         | <input type="radio"/> | <input type="radio"/> | <input type="radio"/> | <input type="radio"/> | <input type="radio"/> | <input type="radio"/> |
| Opinions and information from professors            | <input type="radio"/> | <input type="radio"/> | <input type="radio"/> | <input type="radio"/> | <input type="radio"/> | <input type="radio"/> |
| Opinions and information from fellow students       | <input type="radio"/> | <input type="radio"/> | <input type="radio"/> | <input type="radio"/> | <input type="radio"/> | <input type="radio"/> |
| Opinions and information from relatives and friends | <input type="radio"/> | <input type="radio"/> | <input type="radio"/> | <input type="radio"/> | <input type="radio"/> | <input type="radio"/> |
| Information from the social media                   | <input type="radio"/> | <input type="radio"/> | <input type="radio"/> | <input type="radio"/> | <input type="radio"/> | <input type="radio"/> |
| Theoretical content of the courses                  | <input type="radio"/> | <input type="radio"/> | <input type="radio"/> | <input type="radio"/> | <input type="radio"/> | <input type="radio"/> |
| Practical content of the courses                    | <input type="radio"/> | <input type="radio"/> | <input type="radio"/> | <input type="radio"/> | <input type="radio"/> | <input type="radio"/> |

6. Have you had courses or seminars related to family medicine?

NO. go to the next question

YES. Evaluate your satisfaction

|                    | None                  |                       |                       |                       |                       | Much                  |
|--------------------|-----------------------|-----------------------|-----------------------|-----------------------|-----------------------|-----------------------|
| with this activity | <input type="radio"/> | <input type="radio"/> | <input type="radio"/> | <input type="radio"/> | <input type="radio"/> | <input type="radio"/> |

7. Have you had practice sessions/practical activity in family medicine?

NO. go to the next question

YES. Evaluate your satisfaction

|                    | None                  |                       |                       |                       |                       | Much                  |
|--------------------|-----------------------|-----------------------|-----------------------|-----------------------|-----------------------|-----------------------|
| with this activity | <input type="radio"/> | <input type="radio"/> | <input type="radio"/> | <input type="radio"/> | <input type="radio"/> | <input type="radio"/> |

8. During your years of medical school, would you say your interest in family medicine:

Has increased

Has decreased

Has not changed

## 5. Personal information

### 1. Gender

Male

Female

### 2. What is the population of the area where you went to school (before medical school)?

< 10.000 inhabitants

10.000 - 300.000 inhabitants

> 300.000 inhabitants

### 3. Is one of your parents or relatives a family physician/general practitioner/country doctor/paediatrician?

No

Yes

### 4. Is one of your parents or close relatives a hospital specialist physician?

No

Yes

### 5. Do you have a relative or friend working in primary care/health centre (nurse, midwife, clinical assistant, secretary)?

No

Yes

### 6. Does either of your parents or tutors hold a university degree?

No

Yes

### 7. Have you ever done voluntary work in an organization for periods longer than one month?

No

Yes

### 8. Do you normally attend one of the medical school departments as an intern, collaborator or scholarship student?

No

Yes



9. Have you taken part in any university interchange program, i.e., Erasmus?

No

Yes

10. If you answered yes to the previous question, during what study year/s?

First

Fourth

Second

Fifth

Third

Sixth

## 6. FIS Project

Thank you for your collaboration.

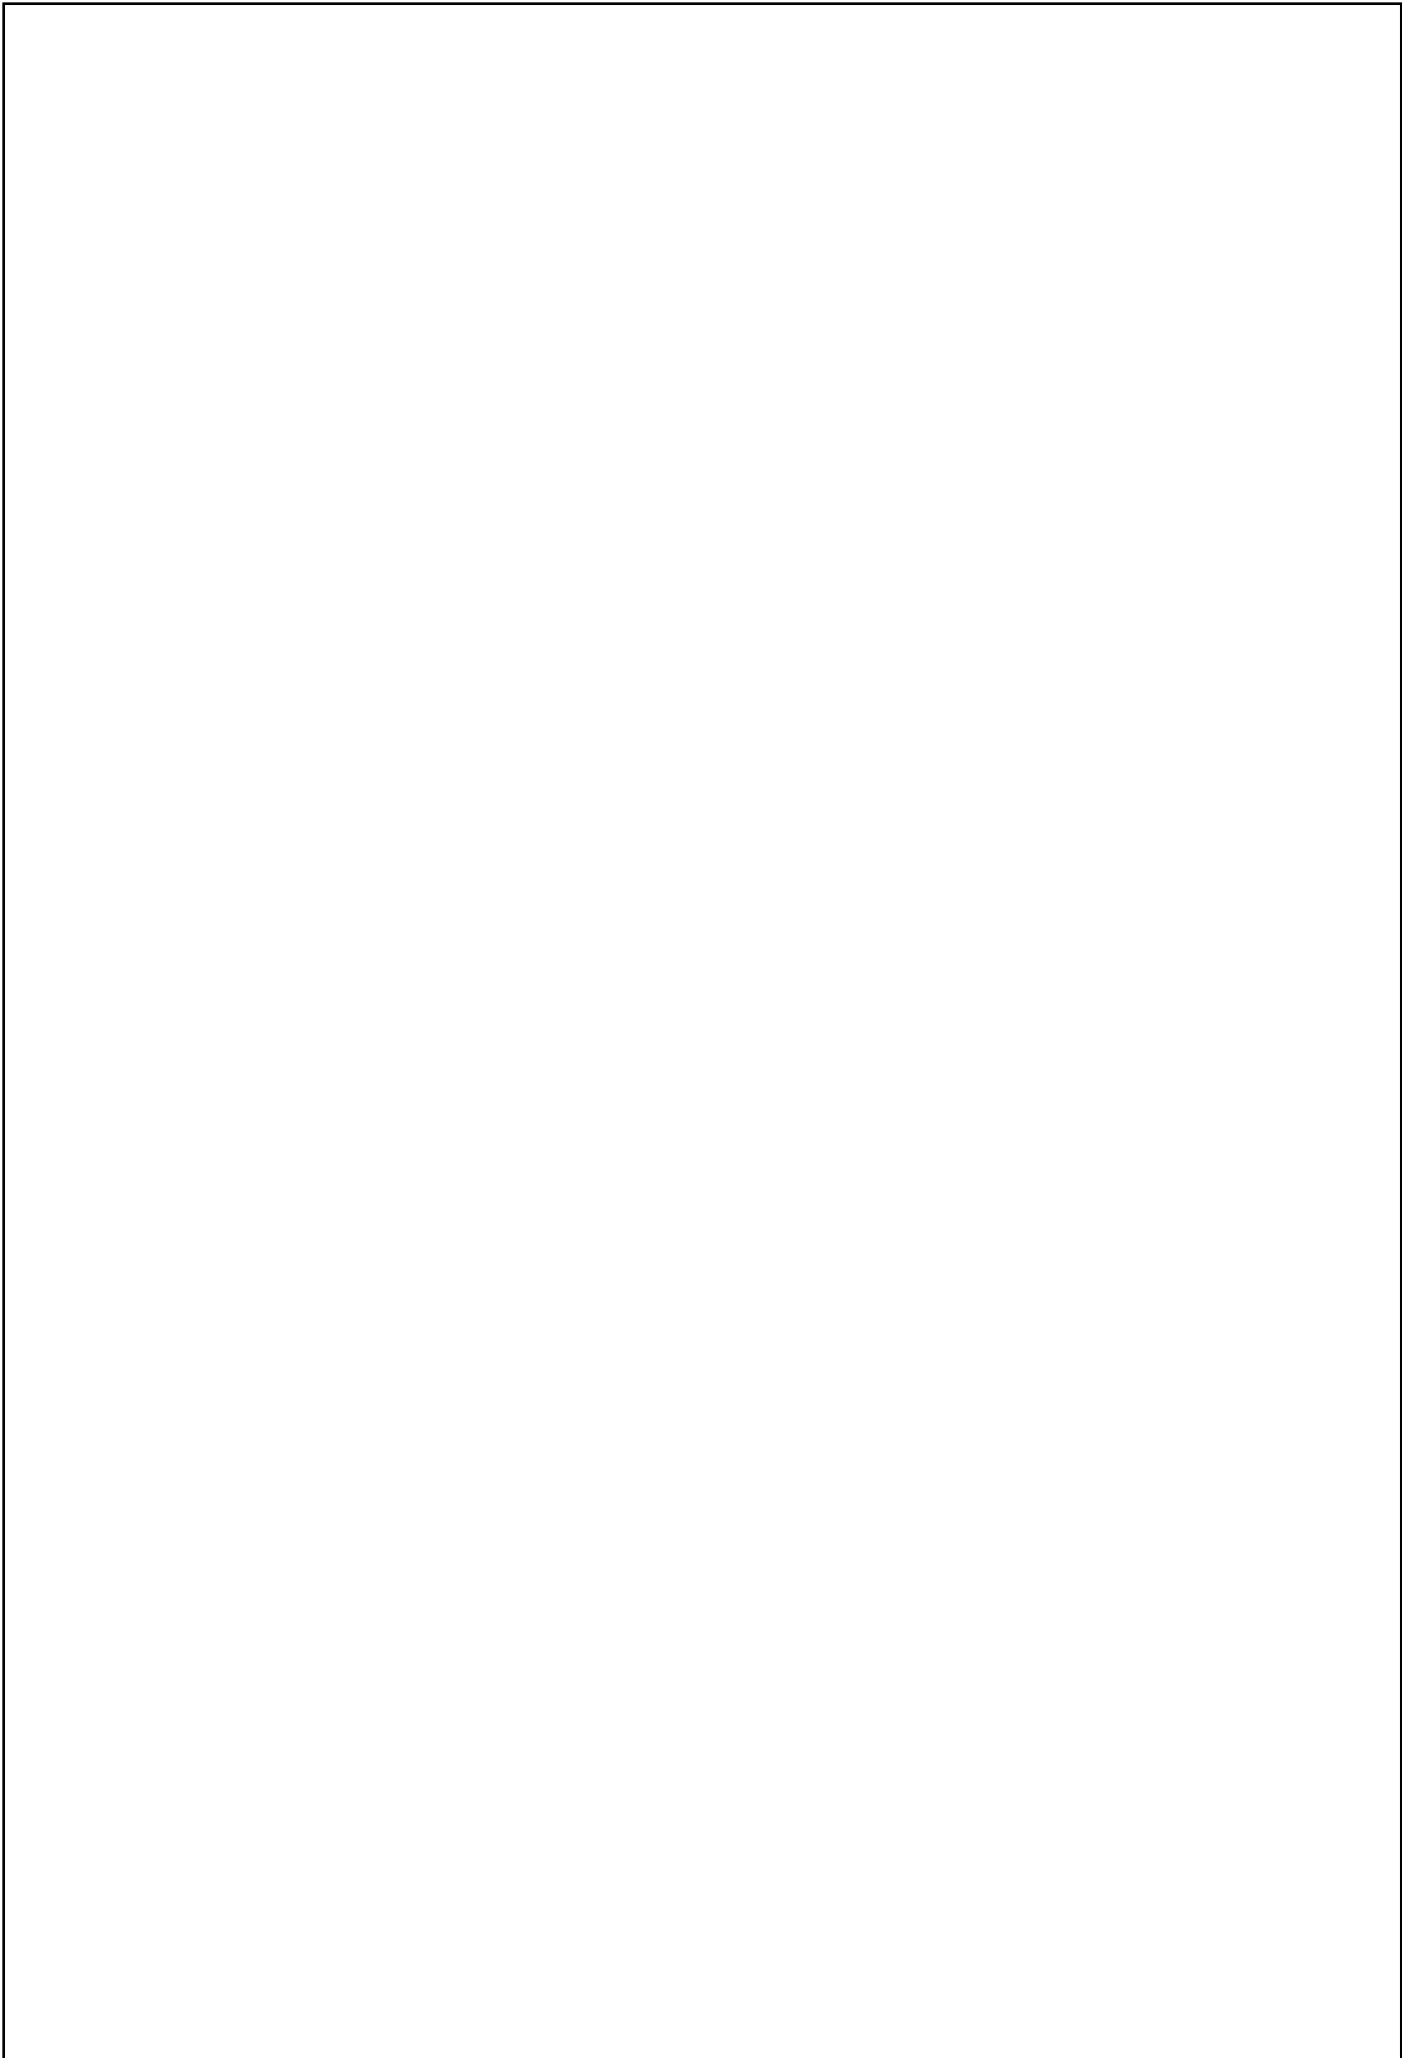

Supplement: 1471-2296-13-47-S1.pdf [file 1471-2296-13-47-S1.pdf]
